# Supplementary figures and images for: Using the Gibbs Function as a Measure of Human Brain Development Trends from Fetal Stage to Advanced Age
Source: MDPI journal article supplement (doi:10.3390/ijms21031116), 2020-02-07

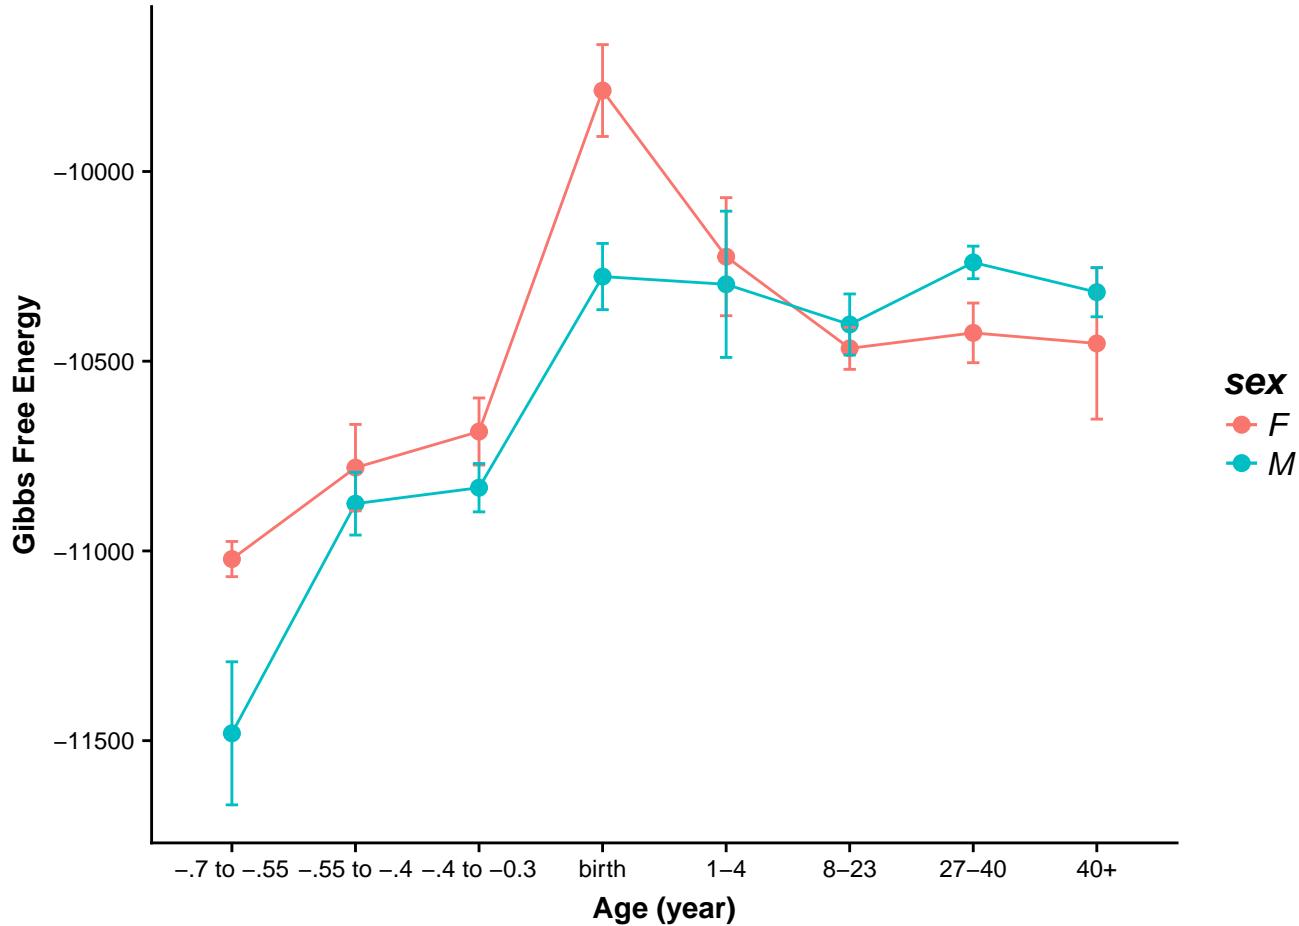

Supplement: s1 [file s1]

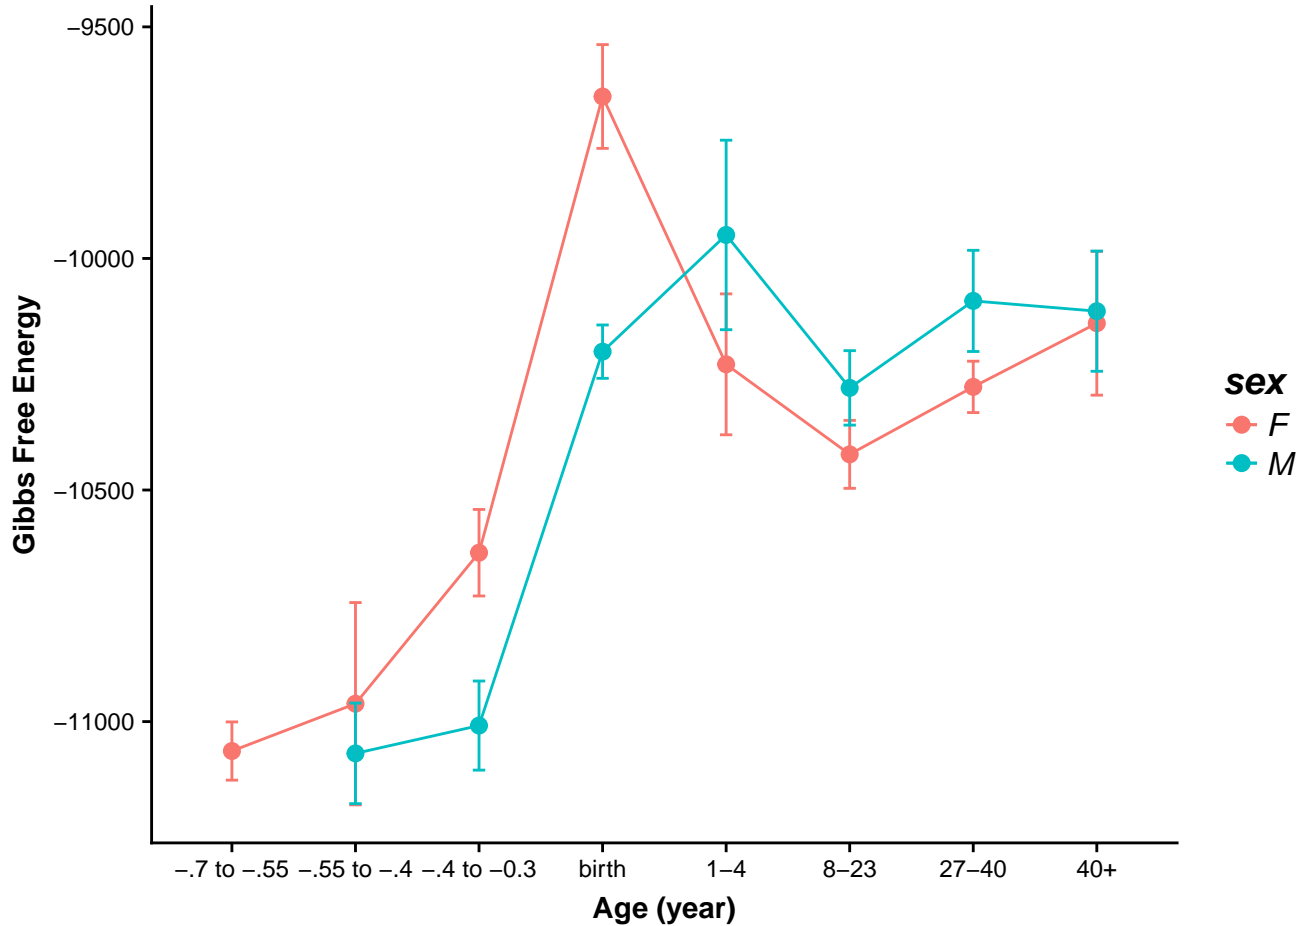

Supplement: s1 [file s1]

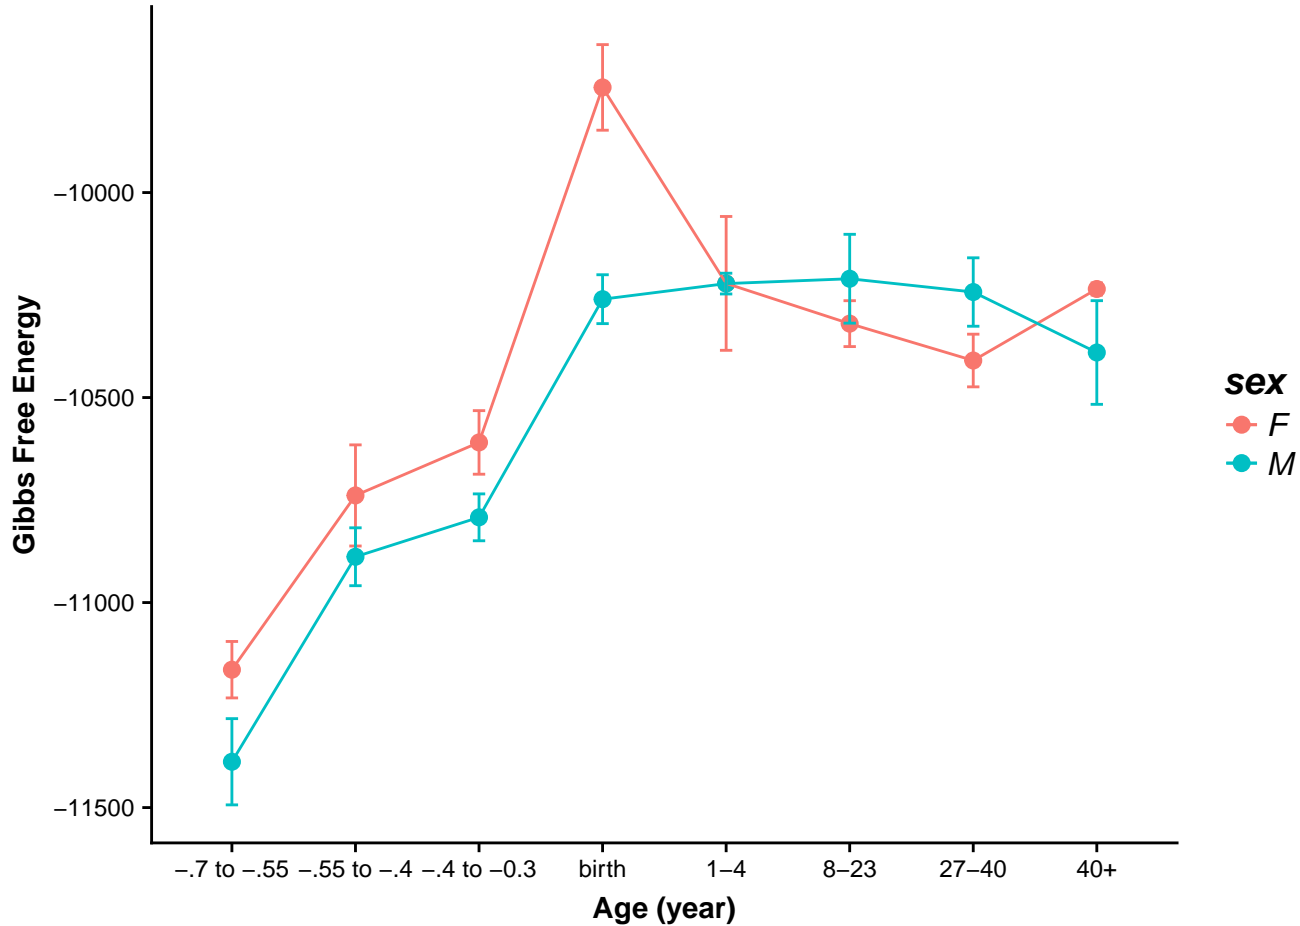

Supplement: s1 [file s1]

Gibbs Free Energy

-11200  
-10800  
-10400  
-10000

-0.7 to -0.55   -0.55 to -0.4   -0.4 to -0.3   birth   1-4   8-23   27-40   40+

Age (year)

**sex**

*F*

*M*

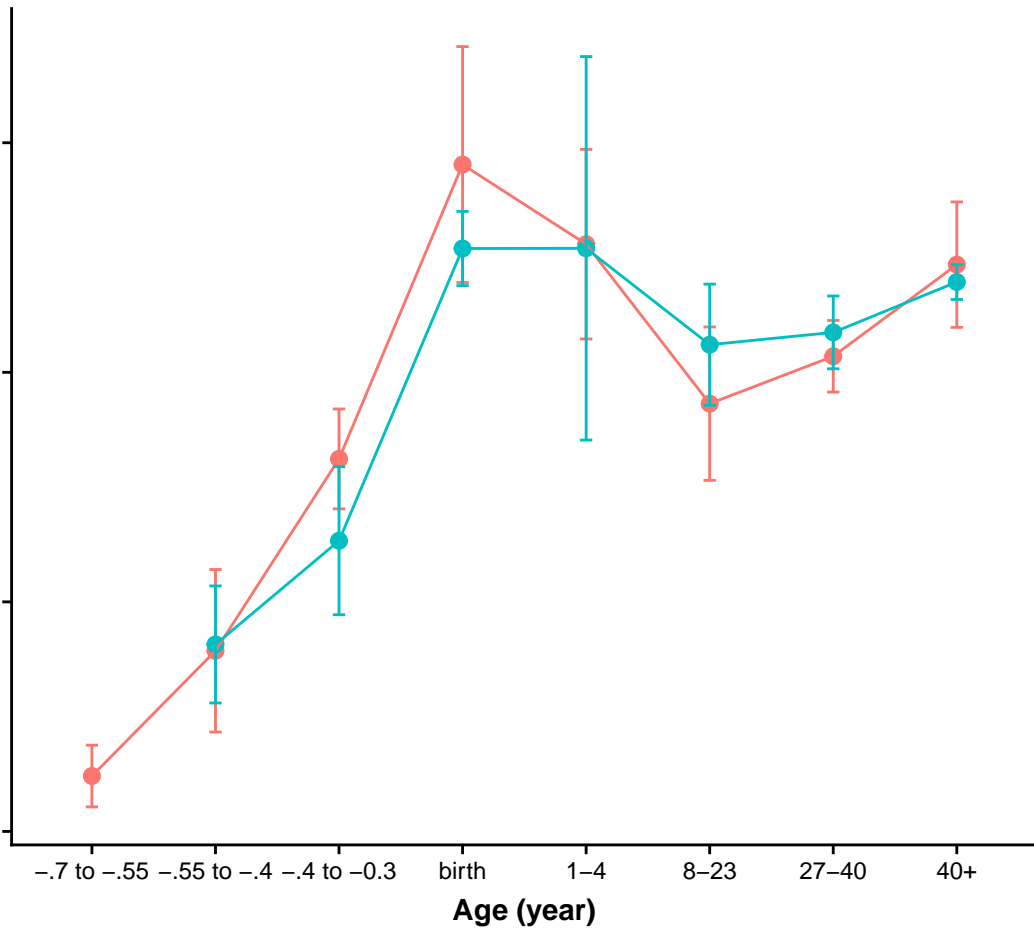

Supplement: s1 [file s1]

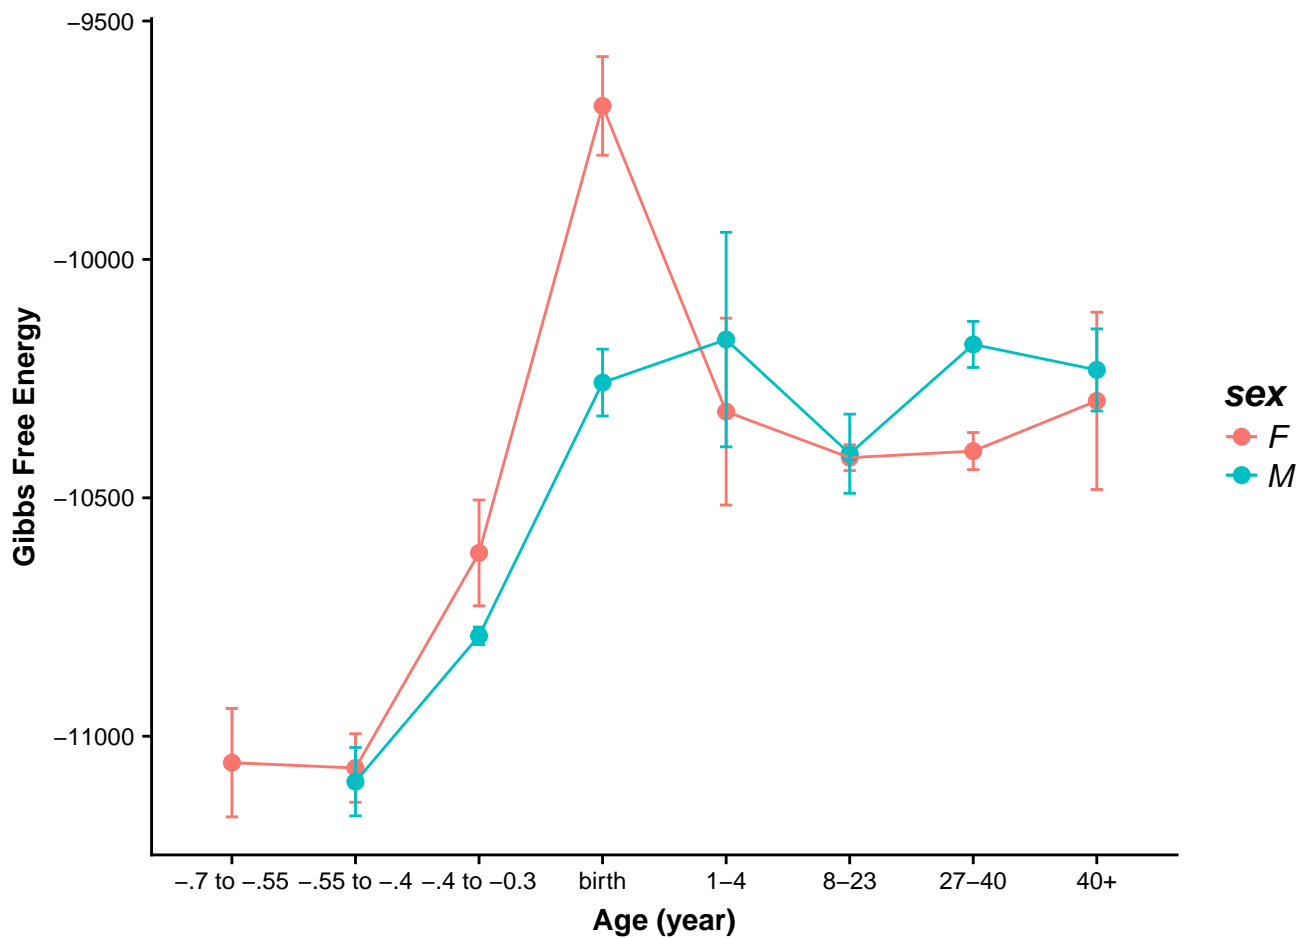

Supplement: s1 [file s1]

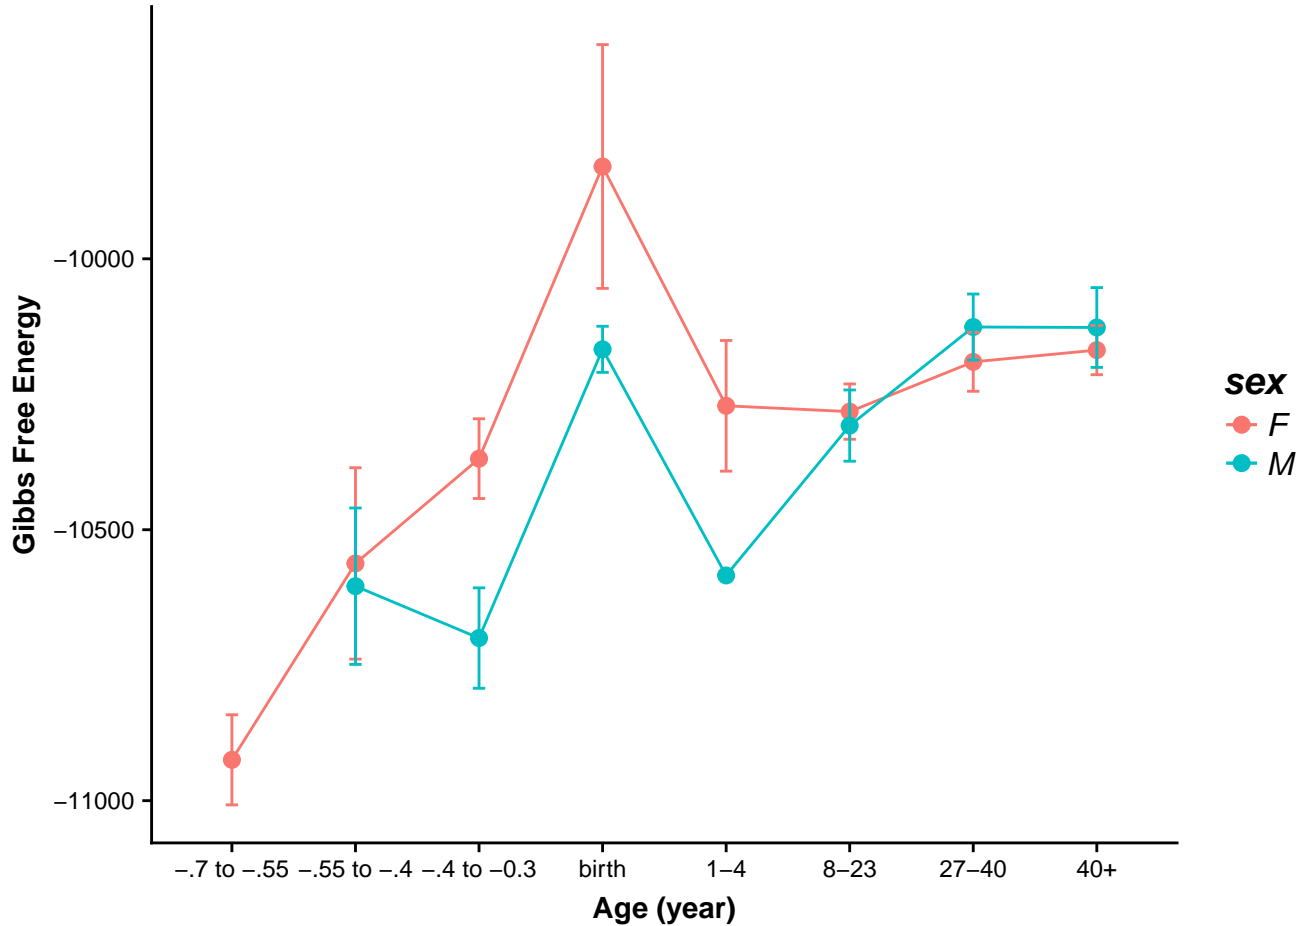

Supplement: s1 [file s1]

Gibbs Free Energy

-11000

-10500

-10000

**sex**

*F*

*M*

-0.7 to -0.55   -0.55 to -0.4   -0.4 to -0.3   birth   1-4   8-23   27-40   40+

**Age (year)**

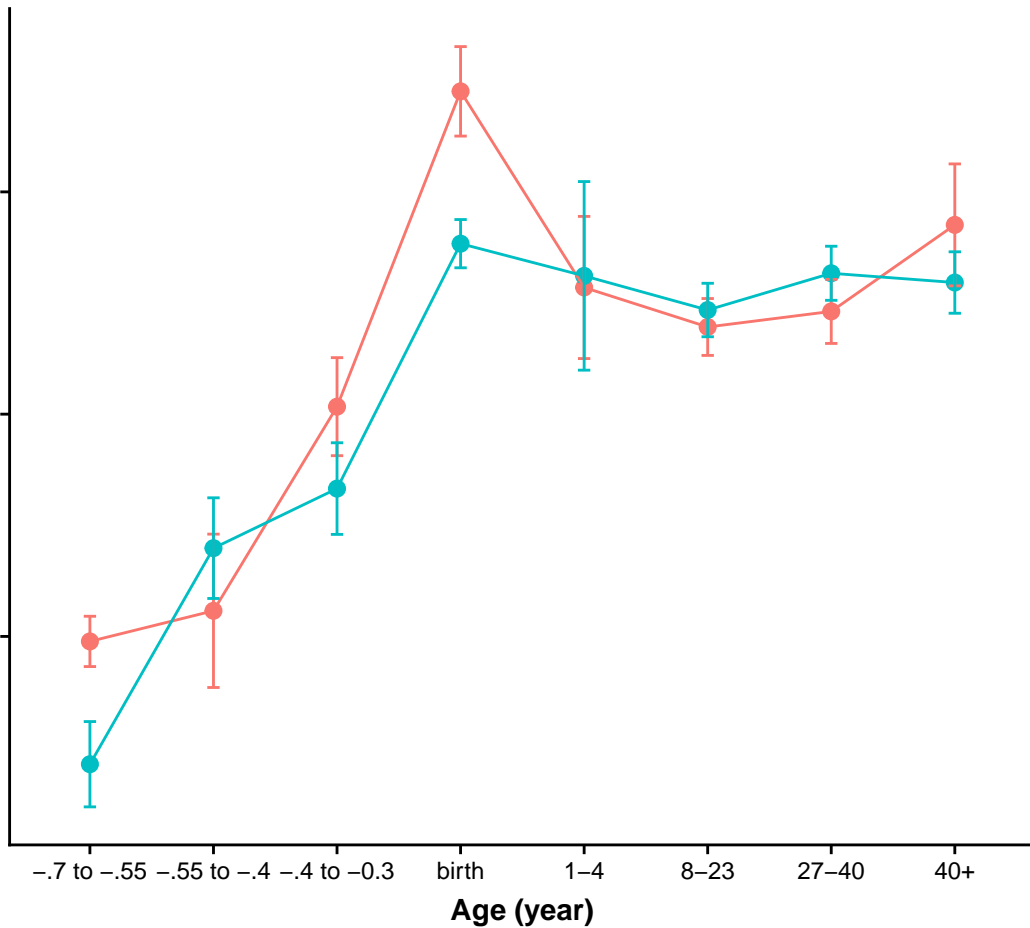

Supplement: s1 [file s1]

Gibbs Free Energy

-11200

-10800

-10400

-10000

-0.7 to -0.55   -0.55 to -0.4   -0.4 to -0.3   birth   1-4   8-23   27-40   40+

Age (year)

sex

F

M

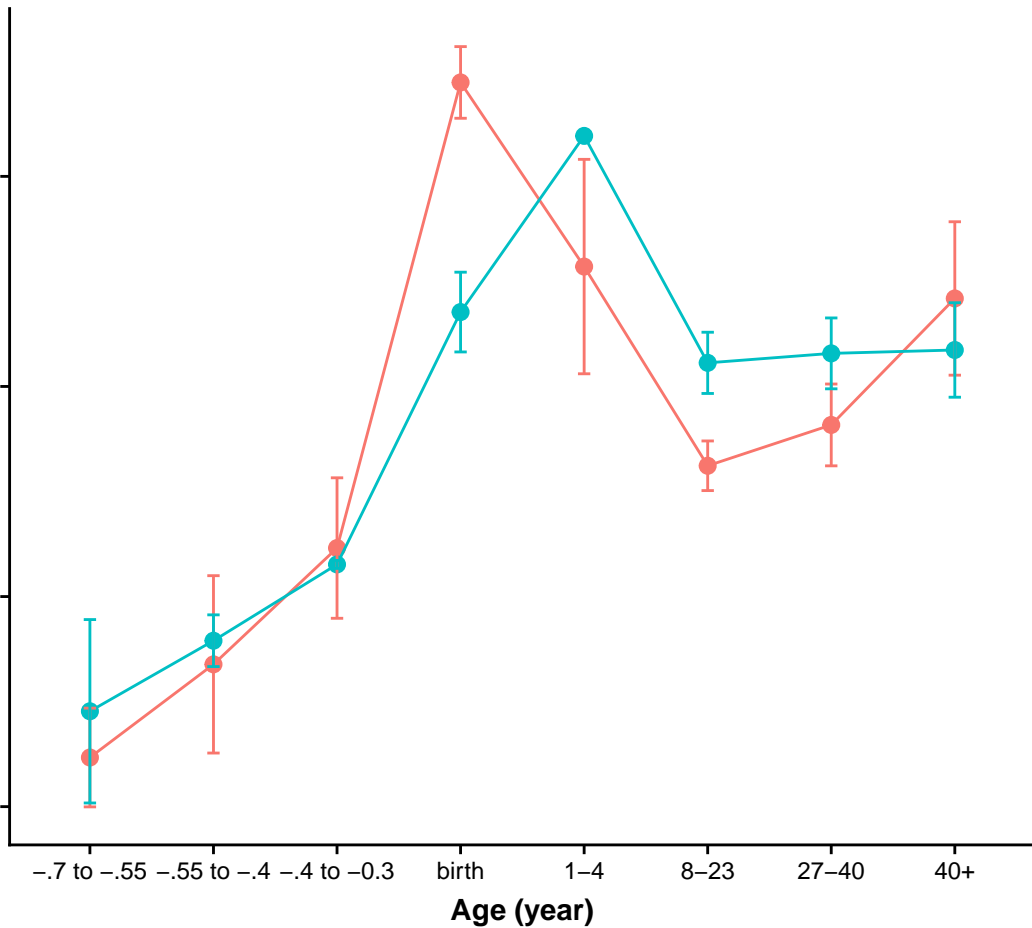

Supplement: s1 [file s1]

Gibbs Free Energy

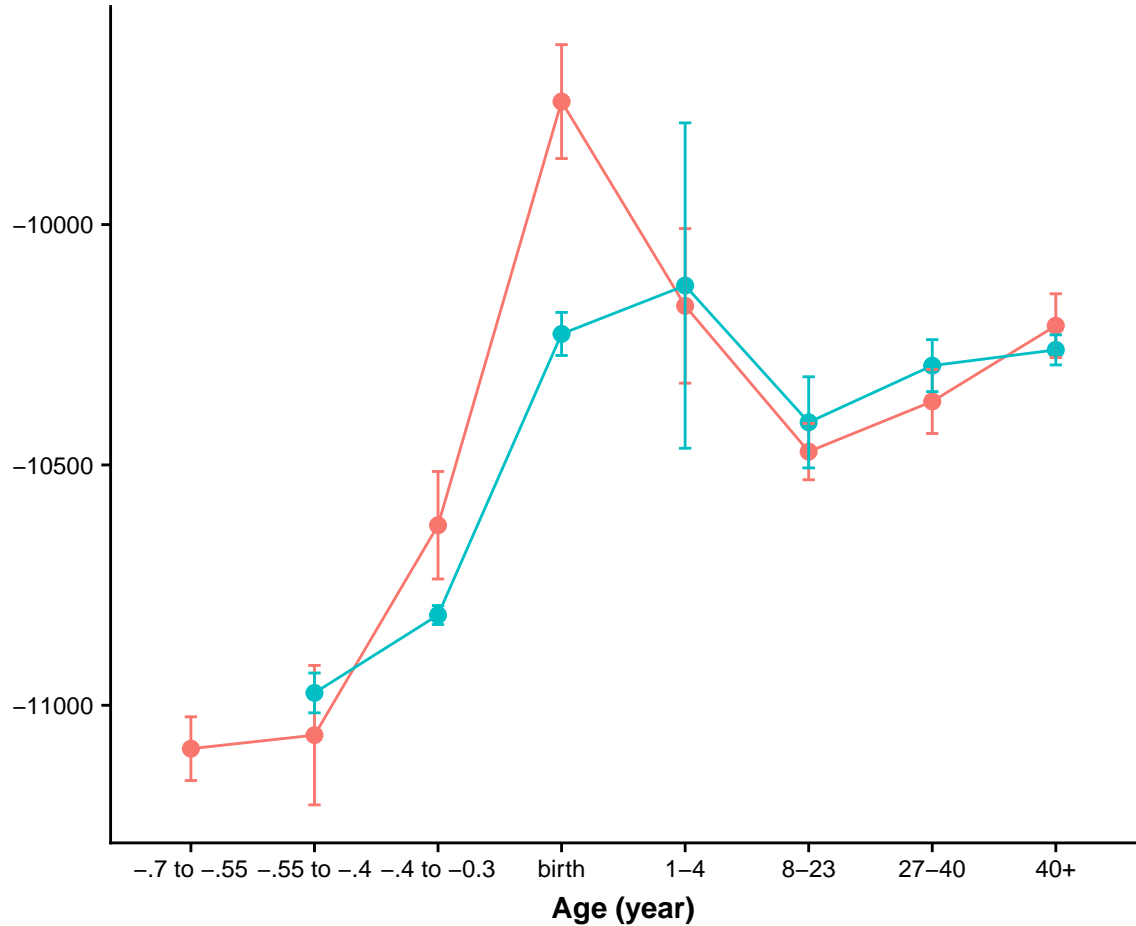

Supplement: s1 [file s1]

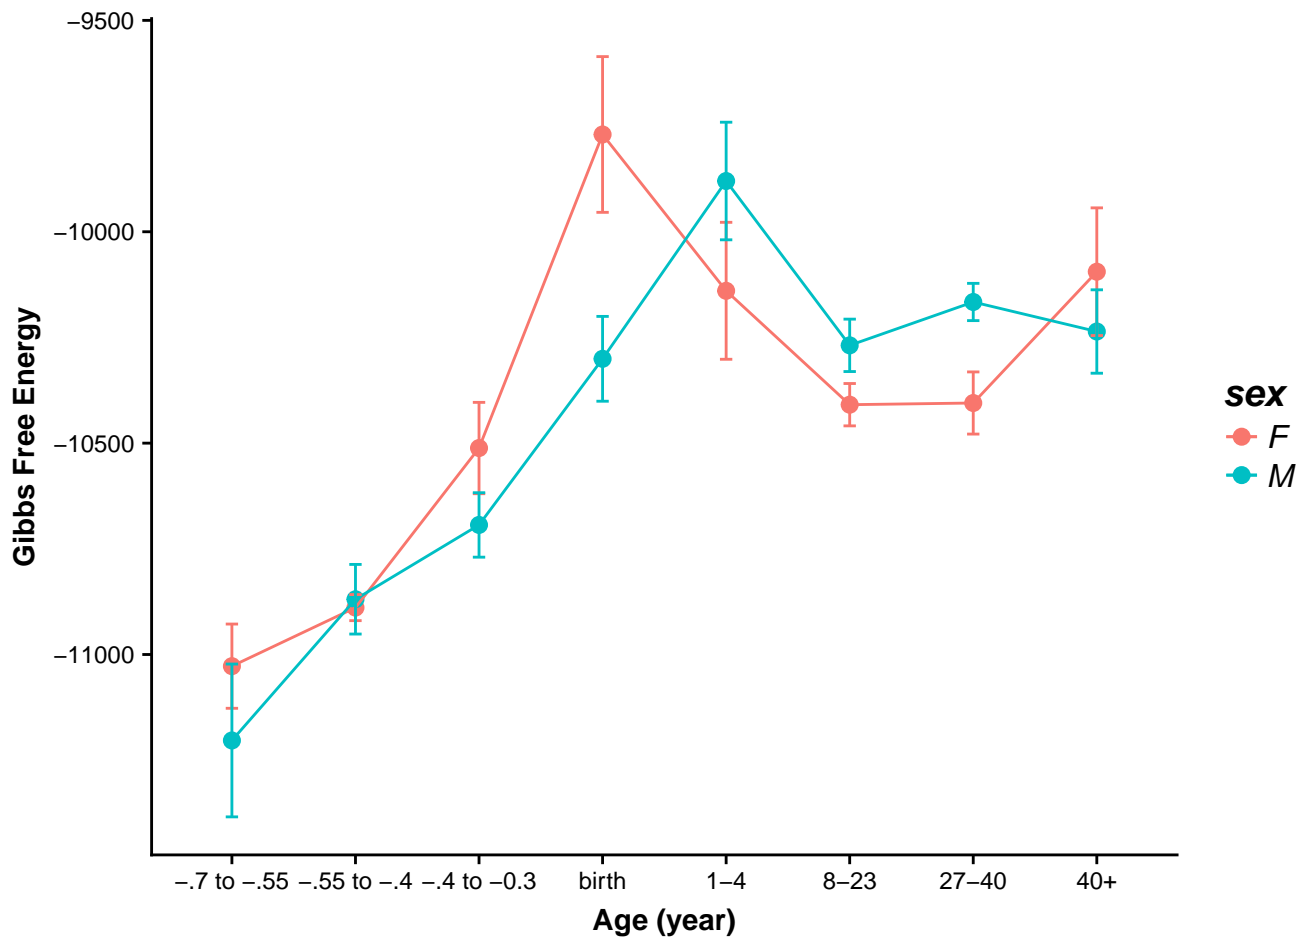

Supplement: s1 [file s1]

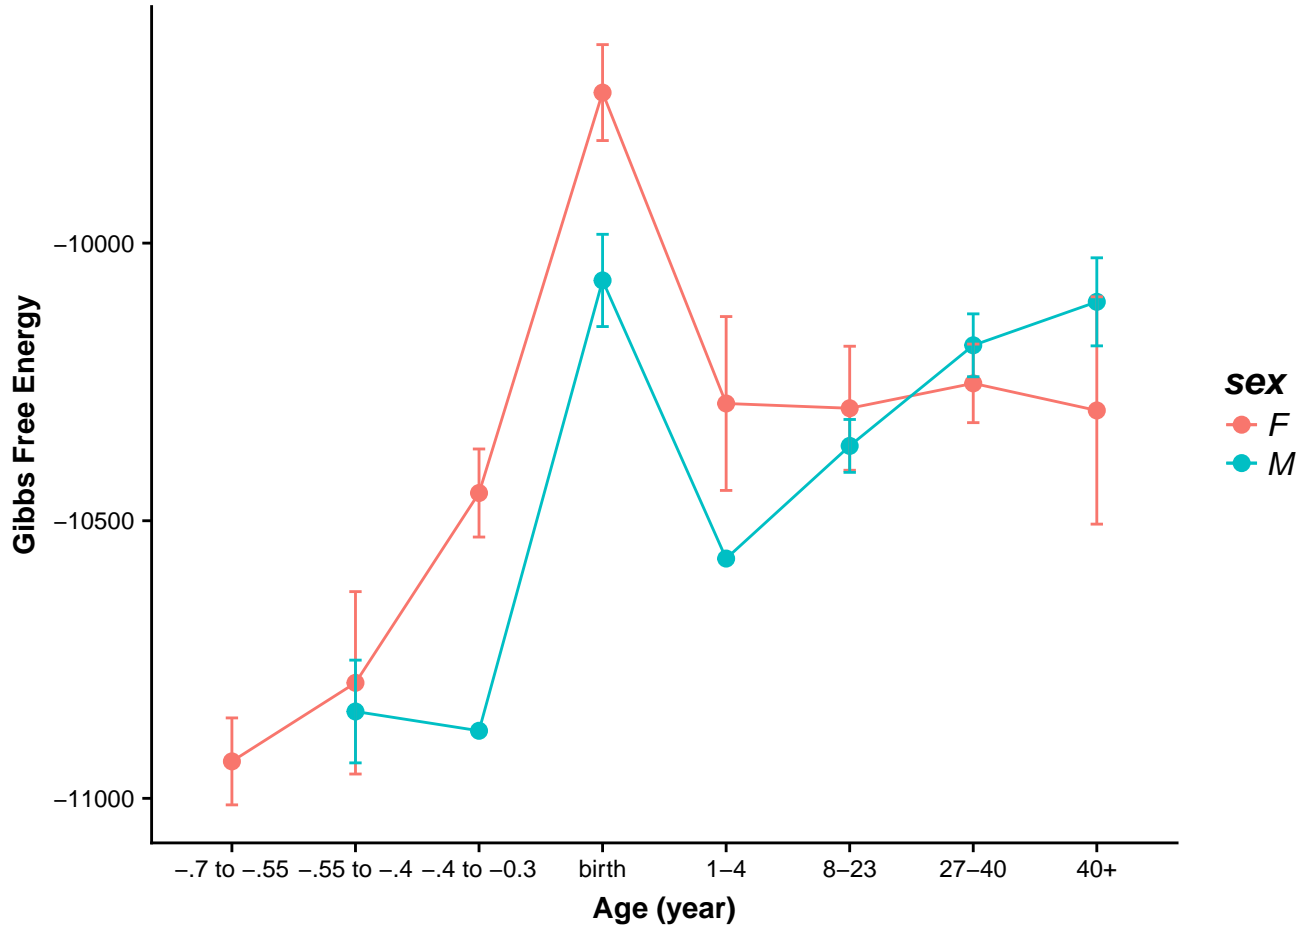

Supplement: s1 [file s1]

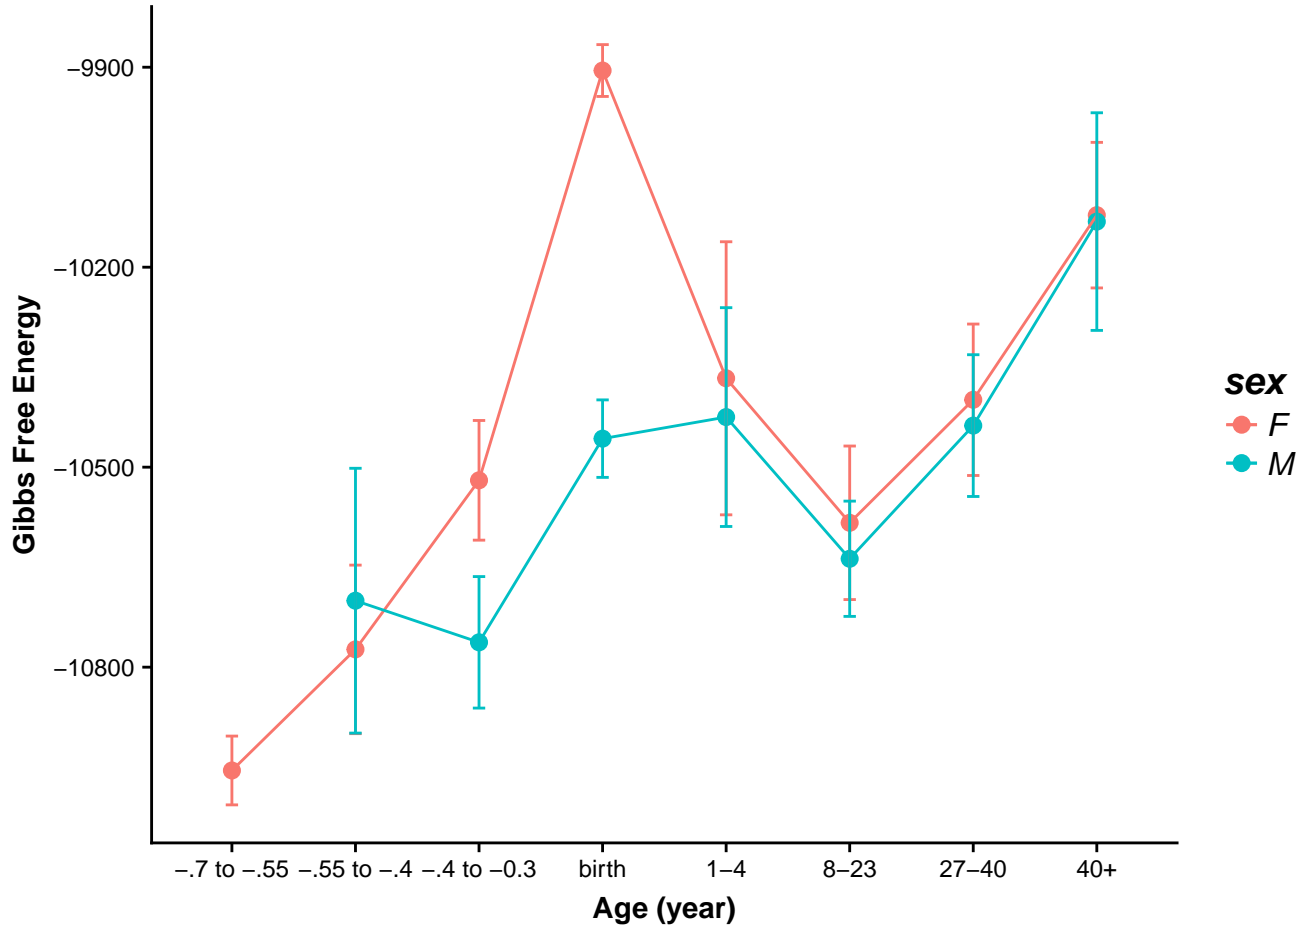

Supplement: s1 [file s1]

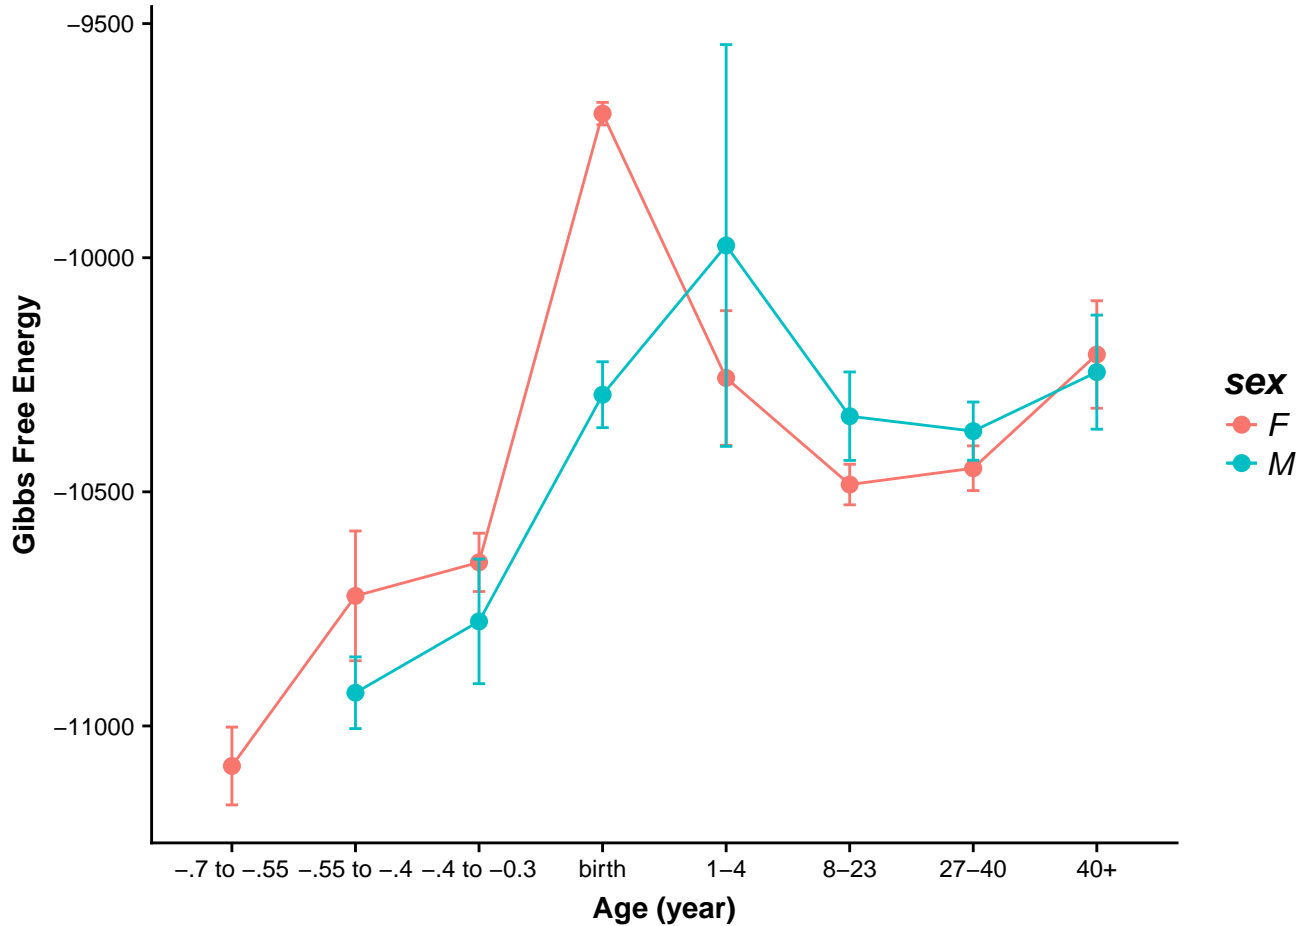

Supplement: s1 [file s1]

Gibbs Free Energy

-10000

-10400

-10800

-11200

-0.7 to -0.55   -0.55 to -0.4   -0.4 to -0.3   birth   1-4   8-23   27-40   40+

Age (year)

**sex**

*F*

*M*

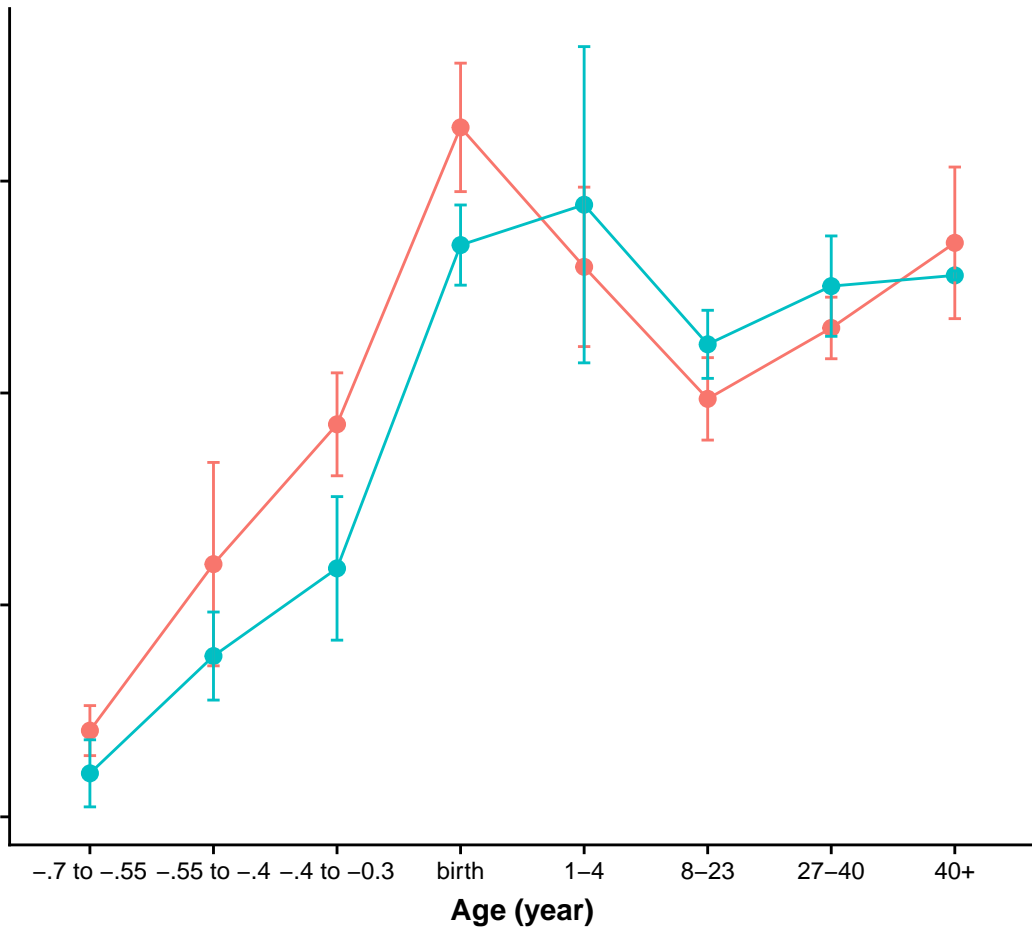

Supplement: s1 [file s1]

Gibbs Free Energy

-10000

-10400

-10800

-11200

-0.7 to -0.55 -0.55 to -0.4 -0.4 to -0.3 birth 1-4 8-23 27-40 40+

Age (year)

sex

F

M

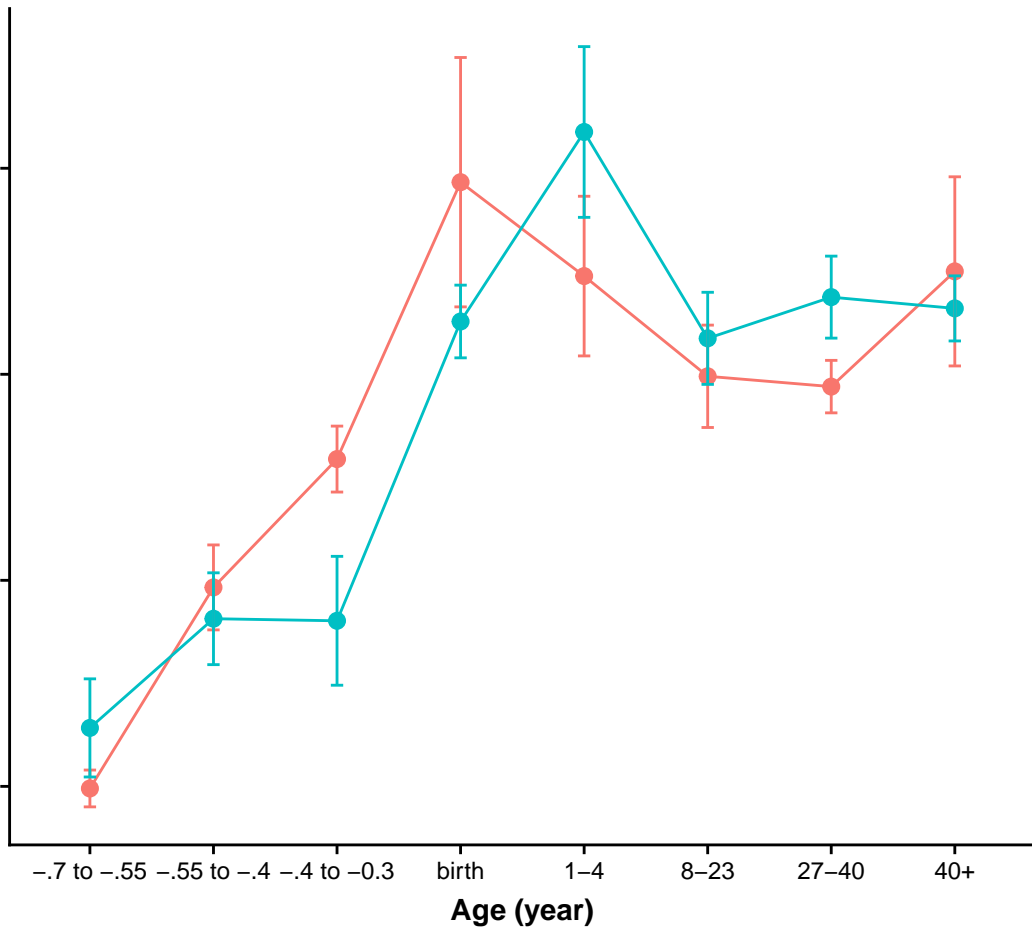

Supplement: s1 [file s1]

Gibbs Free Energy

-10000

-10500

-11000

-0.7 to -0.55 -0.55 to -0.4 -0.4 to -0.3 birth 1-4 8-23 27-40 40+

Age (year)

sex

F

M

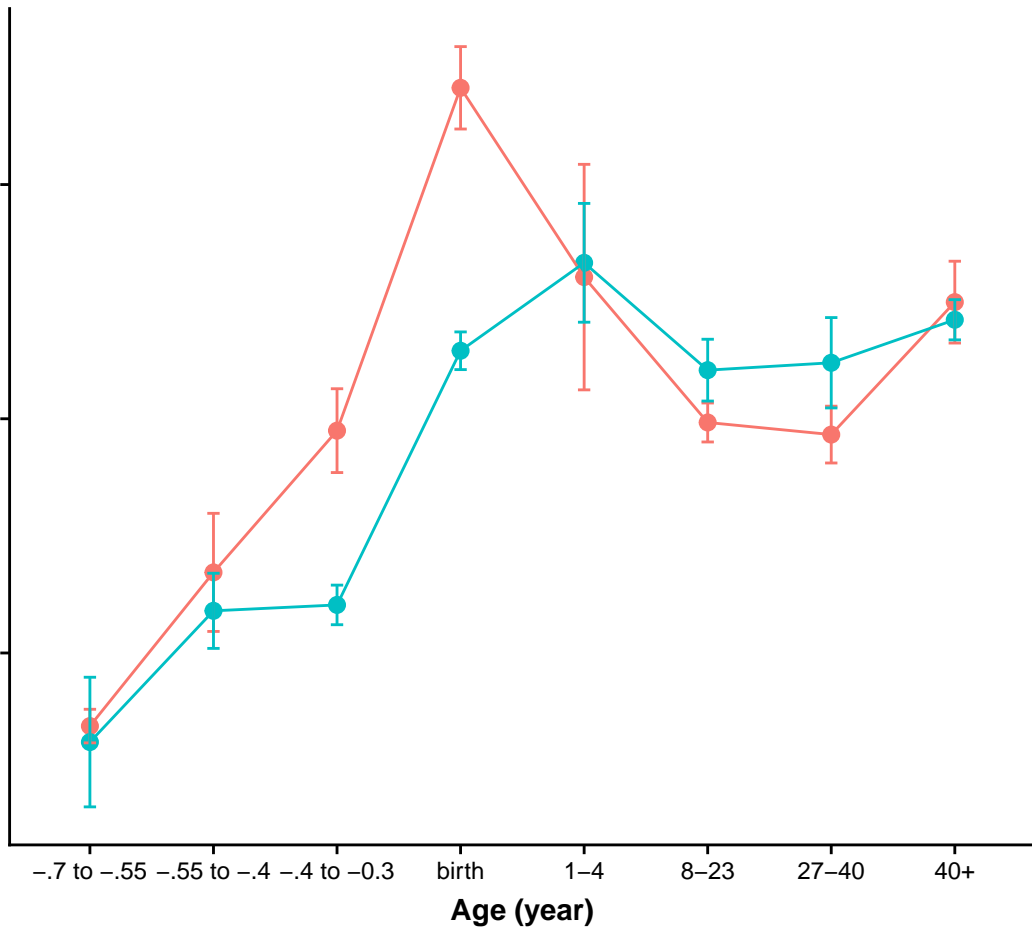

Supplement: s1 [file s1]
